# Supplementary material for: Predictors of a positive attitude of medical students towards general practice – a survey of three Bavarian medical faculties
Source: PubMed Central journal article supplement — GMS Z Med Ausbild. 2013 Nov 15;30(4):Doc45. (PMC3839073), 2013-11-15
Supplement: ZMA-30-45-s-001.pdf [file ZMA-30-45-s-001.pdf]

**Table 2: Attitudes of medical students towards general practice:**

|                                                                                                                      | Erlangen<br>m (sd)<br>n | LMU<br>m (sd)<br>n | TU<br>m (sd)<br>n  | p-value      |
|----------------------------------------------------------------------------------------------------------------------|-------------------------|--------------------|--------------------|--------------|
| <b>Appreciation of general practice</b>                                                                              |                         |                    |                    |              |
| 1. General practice is a valid discipline like internal medicine or paediatrics.                                     | 3,91 (1,20)<br>212      | 3,82 (1,25)<br>385 | 4,12 (1,17)<br>333 | <b>0,002</b> |
| 2. Doing a complete medical history and physical examination is of high importance to practice good medicine.        | 4,93 (0,27)<br>215      | 4,85 (0,49)<br>384 | 4,90 (0,42)<br>332 | <b>0,036</b> |
| 3. Experiences in general practice are valuable to future physicians regardless of their eventual speciality choice. | 3,95 (0,98)<br>211      | 3,80 (1,14)<br>383 | 3,99 (1,04)<br>331 | 0,084        |
| 4. GPs are particularly capable of providing comprehensive care.                                                     | 3,59 (1,07)<br>214      | 3,61 (1,06)<br>383 | 3,82 (1,09)<br>332 | <b>0,006</b> |
| 5. GPs should have more time per patient.                                                                            | 4,58 (0,74)<br>210      | 4,59 (0,67)<br>380 | 4,62 (0,68)<br>326 | 0,779        |
| <b>Comparison with specialists</b>                                                                                   |                         |                    |                    |              |
| 6. The work of a hospital specialist is intellectually more stimulating than that of the GP.                         | 3,15 (1,25)<br>209      | 3,24 (1,25)<br>384 | 3,08 (1,25)<br>331 | 0,236        |
| 7. The work of a specialist working in ambulant care is intellectually more stimulating than that of the GP.         | 2,84 (1,17)<br>206      | 2,87 (1,15)<br>382 | 2,71 (1,23)<br>328 | 0,167        |
| 8. A specialist (e.g. cardiologist) should earn more money than a GP.                                                | 2,18 (1,25)<br>208      | 2,33 (1,31)<br>378 | 2,15 (1,29)<br>326 | 0,099        |
| 9. I would feel somehow frustrated if I could not obtain one of the specialisations other than general practice.     | 2,64 (1,36)<br>206      | 2,66 (1,35)<br>381 | 2,52 (1,40)<br>330 | 0,253        |
| <b>General practitioners' tasks</b>                                                                                  |                         |                    |                    |              |
| 10. Treating acute diseases is more interesting than counselling/caring for chronically ill patients.                | 3,22 (1,17)<br>210      | 3,34 (1,15)<br>382 | 3,26 (1,15)<br>333 | 0,423        |
| 11. Health maintenance (prevention/rehabilitation) is not as interesting to me as curative medicine.                 | 3,06 (1,22)<br>209      | 3,18 (1,24)<br>383 | 3,11 (1,18)<br>332 | 0,422        |
| 12. I prefer to spend time dealing with patients medical problems rather than their psychosocial problems.           | 3,14 (1,30)<br>211      | 3,17 (1,32)<br>383 | 3,12 (1,39)<br>329 | 0,920        |
| 13. In terms of working as a doctor, I take most pleasure in talking to patients.                                    | 3,61 ( 0,99)<br>203     | 3,56 (1,07)<br>380 | 3,63 (1,01)<br>328 | 0,756        |
| <b>Broad interest</b>                                                                                                |                         |                    |                    |              |
| 14. If I were asked to include the three most fascinating medical specialities I'd include general practice.         | 2,47 (1,45)<br>208      | 2,44 (1,47)<br>382 | 2,61 (1,50)<br>329 | 0,258        |
| 15. The future as specialist is more attractive than that of the GP.                                                 | 3,66 (1,15)<br>209      | 3,84 (1,18)<br>380 | 3,67 (1,22)<br>328 | <b>0,049</b> |
| 16. A wide variety of problems encompassing all age groups is interesting to me.                                     | 3,92 (1,08)<br>211      | 3,79 (1,00)<br>380 | 3,97 (1,01)<br>331 | <b>0,027</b> |

|                                                                                                                                                           |                    |                    |                     |              |
|-----------------------------------------------------------------------------------------------------------------------------------------------------------|--------------------|--------------------|---------------------|--------------|
| 17. I feel well prepared for the daily routine as a doctor.                                                                                               | 2,18 (1,03)<br>191 | 2,67 (1,01)<br>377 | 2,18 (0,95)<br>332  | <b>0,000</b> |
| <b>Competence of general practitioners</b>                                                                                                                |                    |                    |                     |              |
| 18. The quality of the medical care provided by GPs is not good                                                                                           | 2,77 (1,06)<br>206 | 2,78 (0,99)<br>368 | 2,63 (0,94)<br>323  | 0,106        |
| 19. In case of uncertainty, GPs should not hesitate to consult a specialist.                                                                              | 3,59 (0,84)<br>207 | 3,56 (0,96)<br>379 | 3,56 (0,95)<br>326  | 0,994        |
| 20. The GP is not as competent as the internist.                                                                                                          | 2,36 (1,15)<br>198 | 2,31 (1,18)<br>376 | 2,10 (1,06)<br>325  | <b>0,018</b> |
| <b>Vocational training in general practice</b>                                                                                                            |                    |                    |                     |              |
| 21. Complex vocational training in general practice at many places and including different specialities is a reason for not choosing it as career option. | 2,26 (1,25)<br>188 | 2,34 (1,24)<br>356 | 2,05 (1,12)<br>321  | <b>0,008</b> |
| 22. Low profit of general practice is an important reason for not choosing general practice as career option.                                             | 3,45 (1,38)<br>205 | 3,75 (1,27)<br>375 | 3,46 (1,30)<br>328  | <b>0,003</b> |
| <b>Teamwork</b>                                                                                                                                           |                    |                    |                     |              |
| 23. A GP should not assume long-term responsibility for patients with chronic illnesses alone.                                                            | 3,67 (0,97)<br>205 | 3,30 (1,12)<br>374 | 3,38 (1,13)<br>325  | <b>0,001</b> |
| 24. A GP should always consult specialists for managing critically ill patients.                                                                          | 3,16 (1,19)<br>209 | 2,87 (1,15)<br>374 | 2,72 (1,15)<br>325  | <b>0,000</b> |
| <b>Organisation</b>                                                                                                                                       |                    |                    |                     |              |
| 25. Physician's assistants should be integrated more than before in the care of patients.                                                                 | 3,10 (1,06)<br>197 | 3,06 (1,14)<br>363 | 3,24 (1,13)<br>311  | 0,065        |
| 26. The provision of services by speciality-oriented physicians should be coordinated and controlled by GP's.                                             | 3,48 (1,15)<br>209 | 3,43 (1,20)<br>369 | 3,29 (1,23)<br>329  | 0,153        |
| <b>Science</b>                                                                                                                                            |                    |                    |                     |              |
| 27. Epidemiological and preventive medicine research is interesting to me.                                                                                | 3,08 (1,21)<br>209 | 2,79 (1,27)<br>380 | 3,02 (1,27)<br>328  | <b>0,007</b> |
| 28. General practice is based upon sound scientific principles.                                                                                           | 3,07 (1,05)<br>182 | 3,29 (0,95)<br>356 | 3,42 (1,01)<br>315  | <b>0,001</b> |
| <b>Time for patients</b>                                                                                                                                  |                    |                    |                     |              |
| 29. A doctor should perform as many direct patient-contact services as possible.                                                                          | 3,79 (0,96)<br>207 | 3,85 (0,99)<br>374 | 3,92 (0,95)<br>3,18 | 0,273        |
| 30. Patients with emotional disorders cannot be helped without spending a lot of the doctor's time.                                                       | 4,17 (1,00)<br>212 | 4,28 (0,94)<br>376 | 4,13 (0,98)<br>327  | 0,098        |
| <b>Electronic patient record</b>                                                                                                                          |                    |                    |                     |              |
| 31. The introduction of electronic patient record is problematic.                                                                                         | 2,64 (1,24)<br>204 | 2,25 (1,18)<br>366 | 2,33 (1,28)<br>320  | <b>0,001</b> |
| <b>Economic efficiency and ethics</b>                                                                                                                     |                    |                    |                     |              |
| 32. Controlling the cost of care is equally important as letting people and doctors have free choice over their healthcare plans.                         | 3,23 (1,21)<br>206 | 3,30 (1,23)<br>364 | 3,35 (1,26)<br>324  | 0,406        |

|                                                                                                                                     |                     |                      |                     |              |
|-------------------------------------------------------------------------------------------------------------------------------------|---------------------|----------------------|---------------------|--------------|
| <b>Health care system</b>                                                                                                           |                     |                      |                     |              |
| 33. The German health care system can only work well with GPs as an integral part of the system.                                    | 4,34 ( 0,86)<br>202 | 4,32 (0,93)<br>370   | 4,39 (0,90)<br>321  | 0,465        |
| <b>Items without significant factor loadings</b>                                                                                    |                     |                      |                     |              |
| 34. A GP should enjoy as much prestige as does the specialist, e.g. a neurosurgeon.                                                 | 4,15 (1,13)<br>210  | 4,23 (1,01)<br>376   | 4,35 (0,94)<br>324  | 0,140        |
| 35. Germany requires more specialists than GPs.                                                                                     | 2,29 ( 1,00)<br>194 | 2,14 (0,96)<br>360   | 2,09 (1,02)<br>303  | <b>0,028</b> |
| 36. GPs have a deeper relationship with their patients than specialists.                                                            | 4,36 (0,83)<br>209  | 4,37 (0,83)<br>381   | 4,32 (0,98)<br>331  | 0,943        |
| 37. Working as a GP in Germany is not very attractive.                                                                              | 3,99 (0,96)<br>206  | 4,08 (1,03)<br>378   | 3,92 (1,03)<br>323  | <b>0,046</b> |
| 38. GPs are among the most respected members of their communities.                                                                  | 2,04 (0,93)<br>209  | 1,97 ( 0,92)<br>375  | 2,05 (0,96)<br>324  | 0,432        |
| 39. Being in general practice provides a physician with an excellent opportunity to make a good living.                             | 3,74 ( 1,01)<br>206 | 3,86 (0,98)<br>380   | 4,15 ( 0,87)<br>331 | <b>0,000</b> |
| 40. The care of geriatric patients is less interesting to me.                                                                       | 3,47 (1,26)<br>211  | 3,58 (1,24)<br>385   | 3,54 (1,23)<br>331  | 0,602        |
| <b>Other</b>                                                                                                                        |                     |                      |                     |              |
| 41. I'd rather prefer a medical specialist training (e.g. abdominal surgery).                                                       | 3,88 (1,22)<br>209  | 3,87 (1,23)<br>370   | 3,76 ( 1,32)<br>323 | 0,612        |
| 42. I'd rather prefer a medical training as GPs.                                                                                    | 2,35 (1,28)<br>207  | 2,20 ( 1,23)<br>374) | 2,36 ( 1,26)<br>322 | 0,138        |
| 43. I think it makes more sense to go through the training as an internist and then perhaps defect to GP care.                      | 3,40 (1,13)<br>201  | 3,43 ( 1,29)<br>373  | 3,46 (1,27)<br>318  | 0,606        |
| 44. I could imagine myself to train general practitioner because I can combine work and family easier in practice than in hospital. | 2,91 (1,38)<br>201  | 2,89 (1,42)<br>378   | 2,99 ( 1,43)<br>327 | 0,601        |
| 45. My studies do not adequately prepare me for the economic aspects of self-employment in an own practice.                         | 3,93 (1,53)<br>190  | 3,48 ( 1,67)<br>373  | 3,59 (1,69)<br>328  | <b>0,006</b> |
| 46. Institutionalisation of general practice at my university can help to make GP more present.                                     | 3,71 (1,27)<br>194  | 3,56 (1,27)<br>361   | 4,05 (1,15)<br>323  | <b>0,000</b> |
| 47. The profession of a family doctor is not very interesting to me because of bureaucracy (e.g. accounting, administrative tasks). | 3,48 (1,20)<br>203  | 3,46 (1,22)<br>375   | 3,22 (1,27)<br>328  | <b>0,019</b> |
| 48. I believe that on average, a resident specialist earns more than a GP.                                                          | 4,29 (0,83)<br>203  | 4,47 ( 0,77)<br>371  | 4,27 (0,90)<br>323  | <b>0,002</b> |
| 49. a) I think the prestige of a specialist is higher than that of a GP.                                                            | 4,07 (0,96)<br>208  | 4,06 ( 1,01)<br>381  | 3,98 ( 1,10)<br>328 | 0,799        |
| b) this is a reason for me rather not to become a GP.                                                                               | 2,08 (1,17)<br>204  | 2,34 (1,27)<br>377   | 2,07 (1,19)<br>328  | <b>0,007</b> |

Scaling of questionnaire: 1 strongly disagree, 2 disagree, 3 undecided, 4 agree, 5 strongly agree
